# Supplementary material
Source: PubMed Central journal article supplement (PMC10134047)
Supplement: NIHMS1883899-supplement-supplement.pdf [file NIHMS1883899-supplement-supplement.pdf]

## Supplementary Appendix

Supplement to: Dougherty MP, Poch AM, Chorich LP, et al. Unexplained female infertility associated with genetic disease variants. *N Engl J Med* 2023;388:1055-6. DOI: 10.1056/NEJMc2211539

This appendix has been provided by the authors to give readers additional information about the work.

## Supplementary Files

Dougherty et al. Unexplained Female Infertility Associated With Genetic-Disease Variants.

|                                |       |
|--------------------------------|-------|
| Supplementary Methods.....     | 2     |
| Supplementary Discussion ..... | 3-4   |
| Supplementary Tables.....      | 5-12  |
| Supplementary Figure .....     | 13    |
| References .....               | 14-15 |

## Supplementary Methods

### Unexplained infertility:

Healthy couples without serious medical problems presented with infertility  $\geq 1$  year and met the following inclusion criteria for the Multiple Intrauterine Gestations from Ovarian Stimulation (AMIGOS) trial: normal uterine cavity with at least one patent fallopian tube,  $\geq 9$  menses/year, and a partner with a motile sperm count  $\geq 5$  million in the ejaculate.<sup>1,2</sup> Females  $\geq 18$  and  $\leq 40$  (mean age  $\sim 32$  years) had a physical exam and baseline labs on entry to the trial.<sup>1</sup>

### Study cohort:

200 female DNA samples were randomly selected from the deidentified cohort of the 575 female AMIGOS study patients and subjected to WES (unfortunately, DNA was not available from male partners). The ethnicity is as follows:  $\sim 95\%$  not Hispanic/Latino and  $5\%$  Hispanic/Latino. In terms of race,  $\sim 81\%$  were White,  $9\%$  Black,  $9\%$  Asian and  $1\%$  American Indian or Alaskan Native. Comparison of our cohort to the two control populations is shown in Table S1.

### Whole Exome Sequencing:

Deidentified genomic DNA was provided through the Reproductive Medicine Network from the AMIGOS trial<sup>1</sup>. DNA (2-3  $\mu\text{g}$ /subject) was sent to the Yale Center for Genome Analysis for WES. DNA was sheared to a mean fragment length of  $\sim 220$  bp by focused acoustic energy (Covaris E220). Blunt ends of the fragment were created followed by phosphorylation using T4 DNA polymerase and T4 polynucleotide kinase. Custom adapters were ligated to each fragment using T4 DNA ligase before amplification by Polymerase chain reaction (PCR).<sup>3</sup> Biotinylated DNA probes (IDT xGen Exome Panel) were synthesized, and hybridizations were performed at  $65^\circ\text{C}$  for 16 hours. The captured fragments were PCR amplified then purified with AMPure XP beads. The Illumina NovaSeq 6000 S4 platform was used to create 100 bp reads. Burrows-Wheeler Aligner (BWA) was used to map sequence reads to the genome. The Genome Analysis Toolkit was used to call exome-wide variants, and Annovar and Variant Effect Predictor were used for variant annotation.<sup>3</sup> Average read depth for our cohort was 63, and  $95.4\%$  of exons were covered  $\geq 20$ -fold.

### Filtering variants:

High quality variants were filtered by gene, mapping quality ( $\geq 60$ ), Combined Annotation Dependent Depletion (CADD) score  $\geq 20$ <sup>4</sup> when applicable, type of variant (frameshift, stop-gained, splice site, missense), and allelic frequency  $\leq 0.01$  in the gnomAD database. Variants of uncertain significance (VUS) in MAG with CADD scores  $\geq 20$  were tabulated.

### Variant confirmation:

P/LP variant calls from WES underwent confirmation with Sanger sequencing in triplicate.<sup>3</sup> P/LP calls were annotated using Clinvar and Varsome databases.

### Statistical analysis:

Our primary outcome was the percent of women with P/LP variants in MAG compared to control databases, which reported secondary findings in 59 MAG from unselected patient populations— $2\%$  in the UK Biobank (UKB) and  $2.5\%$  in the NIH-funded Electronic Medical Records and Genomics (eMERGE) Network.<sup>5,6</sup> Power analysis at an alpha of  $0.05$  to detect a  $4\%$  (or 3-fold) difference in the prevalence of P/LP variants between unexplained infertility cohort and the UKB would require 141 patients at  $80\%$  power and 209 at  $90\%$  power. For the eMERGE population, samples of 165 and 242 were necessary at  $80\%$  and  $90\%$  power, respectively. Based upon this, we chose a sample size of 200. Statistical analysis was performed using Fischer's exact test.

## Supplementary Discussion

We hypothesized that a genetic link exists between infertility and future medical illness. Utilizing WES from 197 DNA samples, we found that females with unexplained infertility have a 6.6% prevalence of P/LP variants in the 59 MAG known to cause serious medical illness. This amounted to a 2.5-3-fold higher prevalence of P/LP variants in the 59 MAG compared to two large, unselected patient populations.<sup>5,6</sup> The UK-based study of 49,960 unselected individuals showed a 2% prevalence in P/LP variants in MAG.<sup>5</sup> These findings were supported by the more diverse eMERGE population of 21,915 unselected individuals with a 2.5% detection rate of P/LP MAG variants.<sup>6</sup> MAG variants are highly penetrant and portend a substantial impact on health outcomes (Table S2; Table S3). Additionally, offspring have a 50% chance of inheriting these autosomal dominant (and one X-linked recessive) conditions, and those who inherit these genetic variants are also at serious risk.

Most MAG variants identified in our population (9/14=64%) were associated with hereditary cancers and CVD, consistent with prior findings in women with prior infertility.<sup>7-11</sup> In one recent secondary analysis of a large multicenter, randomized clinical trial there was an independent association between infertility and mortality among females.<sup>8</sup> The  $\geq 10$  year follow up showed a 10% increase in all-cause mortality during the study period in women with infertility.<sup>8</sup> In infertile women who were otherwise at low-risk for cancer, there was an observed 23% increased risk of death due to cancer, which was predominantly due to a 2.6-fold increase occurrence of breast cancer.<sup>8</sup> We propose that this increase in breast cancer is due at least in part to genetic causes, as we found four women (2%) with P/LP variants in *BRCA1/2*. Another four-year follow-up study showed a 32% increased risk of death from any cause (adjusted hazard ratio of 1.32).<sup>12</sup> This increased risk was seen across all ages, races and ethnicities, known comorbidities and modes of delivery.<sup>12</sup> Furthermore, this risk was seen with infertility diagnosis and testing, but not for treatment, implicating the diagnosis of infertility for increased risk of poor medical outcomes.<sup>12</sup>

There is limited data regarding an underlying mechanism by which infertility may presage mortality and medical co-morbidities despite known associations. However a proposed mechanism does exist for *BRCA1* and *BRCA2*.<sup>13,14</sup> There is increasing evidence that infertility shares a common physiologic pathway with cancer genes as *BRCA2* is known to play an important role for homologous recombination in meiosis<sup>15</sup> and *BRCA1* is involved in meiotic synapsis and crossover.<sup>16,17</sup> Additionally, both *BRCA1* and *BRCA2* play an essential role in double strand break repair, which has been associated with ovarian aging in addition to cancer risk.<sup>14,17,18</sup> Disruption of this pathway could contribute to the earlier age of menopause and lower ovarian reserve seen in patients affected by *BRCA1* or *BRCA2* variants.<sup>14,17,19,20</sup> In our study, there was more than a 7-fold increased likelihood of having a P/LP *BRCA1* or *BRCA2* variant with unexplained infertility. While this alone does not prove a genetic cause for the increased risk of death due to cancer in infertile females,<sup>8,12,21</sup> it provides supporting evidence and illustrates the need for further investigation.

An increased risk of CVD has also been associated with infertility. This was largely attributed to decreased estradiol exposure in patients with diminished ovarian reserve and primary ovarian insufficiency (POI),<sup>10,11,22</sup> or metabolic syndromes resulting from polycystic ovary syndrome.<sup>9</sup> A considerable number of P/LP variants related to CVD were identified in 3% (6/197) women, which included familial hypercholesterolemia, arrhythmias, cardiomyopathy, and increased risk of aortic dissection. A common pathway connecting CVD and infertility has yet to be discovered. It is possible that infertility is only a biomarker for future medical illness. P/LP variants were also identified in inborn errors in metabolism (Fabry disease), and other miscellaneous disorders including malignant hyperthermia, and myopathy. All described variants pose considerable health

risks (Table S2, Table S3). Even if a common pathway cannot be confirmed, a strong association between infertility and future disease can still assist in early detection and intervention.<sup>23</sup>

In addition to P/LP variants in MAG, 10.7% of women with unexplained infertility demonstrated P/LP variants in genes resulting in conditions not considered medically actionable. These disorders include >20 autosomal dominant conditions (Table S3; Table S5), many of which are severe, life altering or debilitating disorders. An *ANAX11* P variant was identified in one subject which portends a 90% risk for developing amyotrophic lateral sclerosis (ALS), a severe neurodegenerative disease. Additionally, two patients were found to each have a P variant in a gene associated with cancer outside of the 59 medically actionable genes (*ATM* and *RAD51C*). We found P/LP variants in several other neurologic disorders (Alzheimer disease, neuropathy, early onset Parkinson disease, ophthalmic disease) as well as other conditions (Table S3; Table S5). Two disorders, hypogonadotropic hypogonadism and POI, also result in infertility making them particularly interesting.

P/LP variants were identified in 6.6% in MAG and 10.7% of genes not considered MAG. We also identified 196 rare VUS in 46 of the 59 MAG, which either have a high impact variant call (splice site, frameshift, stop gained) or were missense variants with a CADD score  $\geq 20$  (Table S4). Most variants are involved in genes for cancer and CVD. VUS will require *in vitro* studies to determine pathogenicity. Nonetheless, it is likely that at least several VUS could be shown to be deleterious, which would increase the detection rate.

There are several barriers to understanding how infertility is associated with future medical illness. One is through investigating all patients with infertility, instead of well-defined patient populations. Our findings are likely only relevant to females with unexplained infertility. We cannot conclude that women with polycystic ovary syndrome, tubal disease, or endometriosis will have the same risks, although these causes of infertility should also be interrogated in future studies. Likewise, the frequency of P/LP variants in MAG of males is currently unknown since we did not have their DNA available.

Our study is not without limitations. The increased prevalence of P/LP variants in unexplained infertility was largely seen in White women. More diverse population studies will be needed, although MAG variants in eMERGE displayed similar prevalence in Whites vs. Nonwhites after exclusion of a known *HFE* variant common in Whites.<sup>6</sup> To determine the true prevalence of P/LP variants in patients with unexplained infertility, *in vitro* analysis of the VUS is necessary. Also, the control studies did not exclude patients with infertility. While this would only increase the significance of our findings, it still could affect the true increase in P/LP variants between fertile and infertile populations. Furthermore, patient information from the AMIGOS trial is deidentified without detailed family history or long term follow up. However, these variants are known to be highly penetrant and have been found to have a substantial impact on health outcomes.

The strength of this study is the relatively large sample size and the rigorous screening process for the AMIGOS clinical trial. We used an unbiased approach of WES to identify genetic disorders<sup>24,25</sup> on a well-characterized group of females with unexplained infertility and found a significantly higher prevalence of P/LP variants in MAG than unselected individuals from large data sets.<sup>5,6</sup> Additionally, these variants were confirmed by Sanger sequencing, which was not reported in the control studies.<sup>5,6</sup> To our knowledge, this is the first study that identified an increased prevalence of disease-causing genetic variants in females with unexplained infertility. Although only 6.6% of subjects had a P/LP variant in a MAG, the finding of ~11% with additional P/LP variants in non-MAG requires further study. We cannot routinely recommend WES for women with unexplained infertility at this time. Our findings support the notion that the higher incidence of future medical illness in women with unexplained infertility may have a genetic component.

| <b>Race/Ethnicity</b>  | <b>Our cohort (%)</b> | <b>21,915 patient trial (%)</b> | <b>49960 patient trial (%)</b> |
|------------------------|-----------------------|---------------------------------|--------------------------------|
| <b>White</b>           | 160 (81.2)            | 14480 (66.0)                    | 46762 (93.6)                   |
| <b>Black</b>           | 17 (8.6)              | 3279 (14.9)                     | 744 (1.5)                      |
| <b>Hispanic</b>        | 9 (4.5)               | 1666 (7.6)                      | Not reported                   |
| <b>Asian</b>           | 9 (4.5)               | 1497 (6.8)                      | 270 (0.5)                      |
| <b>American Indian</b> | 2 (1.0)               | 77 (0.4)                        | 0 (0)                          |

Table S1. Race and ethnicity of the participants in the study population and the control populations. ~4% of patients in the trial of 21,950 unselected individuals did not respond<sup>6</sup> and ~5% of the race/ethnicity of patients in study with 49,960 patients are unknown.<sup>5</sup>

| No.                              | Gene    | Cytoband | HGVS coding       | Protein Change     | Variant type | Affected Exon                | Amino Acid Affected | GnomAD Frequency (%) | ACMG call         | Race      |
|----------------------------------|---------|----------|-------------------|--------------------|--------------|------------------------------|---------------------|----------------------|-------------------|-----------|
| Cancer genes                     |         |          |                   |                    |              |                              |                     |                      |                   |           |
| 1                                | BRCA1   | 17q21.31 | c.1953dup         | p.Lys652GlufsTer21 | Frameshift   | 10 of 24                     | 651 of 1885         | 0                    | Likely Pathogenic | Caucasian |
| 2                                | BRCA2   | 13q13.1  | c.2857dup         | p.Asn986LysfsTer2  | Frameshift   | 11 of 27                     | 986 of 3419         | 0                    | Pathogenic        | Caucasian |
| 3                                | BRCA2   | 13q13.1  | c.2957dup         | p.Trp1692MetfsTer3 | Frameshift   | 11 of 27                     | 1692 of 3419        | 0.002                | Pathogenic        | Caucasian |
| 4                                | BRCA2*  | 13q13.1  | c.10095_10096insT | p.Ser3366Ter       | Stop gained  | 27 of 27                     | 3366 of 3419        | 0.3                  | Likely Pathogenic | Caucasian |
| Connective tissue disorder genes |         |          |                   |                    |              |                              |                     |                      |                   |           |
| 5                                | MYH11   | 16p13.11 | c.1593_1596dup    | p.Asn533ThrfsTer50 | Frameshift   | 14 of 42                     | 532 of 1980         | 0                    | Likely Pathogenic | Caucasian |
| Cardiomyopathy genes             |         |          |                   |                    |              |                              |                     |                      |                   |           |
| 6                                | GLA     | Xq22.1   | c.644A>G          | p.Asn215Ser        | Missense     | 5 of 7                       | 215 of 430          | 0.001                | Pathogenic        | Caucasian |
| Arrhythmia genes                 |         |          |                   |                    |              |                              |                     |                      |                   |           |
| 7                                | PKP2    | 12p11.21 | c.1951C>T         | p.Arg651Ter        | Stop gained  | 9 of 14                      | 651 of 882          | 0                    | Pathogenic        | Caucasian |
| 8                                | KCNQ1   | 11p15.5  | c.573_577del      | p.Arg192CysfsTer91 | Frameshift   | 3 of 16                      | 191 of 677          | 0.002                | Pathogenic        | Caucasian |
| 9                                | SCN5A   | 3p22.2   | c.3784C>T         | p.Arg1262Ter       | Stop gained  | 21 of 27                     | 1262 of 1963        | 0                    | Pathogenic        | Caucasian |
| 10                               | SCN5A   | 3p22.2   | c.3746G>A         | p.Arg1249Gln       | Missense     | 21 of 27                     | 1249 of 1963        | 0.001                | Likely Pathogenic | Caucasian |
| Miscellaneous genes              |         |          |                   |                    |              |                              |                     |                      |                   |           |
| 11                               | RYR1    | 19q13.2  | c.957+5_957+29del | -                  | Splice site  | Deletion in intron 10 of 105 | -                   | 0.041                | Likely Pathogenic | Caucasian |
| 12                               | RYR1*   | 19q13.2  | c.325C>T          | p.Arg109Trp        | Missense     | 4 of 106                     | 109 of 5039         | 0.083                | Pathogenic        | Caucasian |
| 13                               | APOB    | 2p24.1   | c.13028_13029del  | p.Tyr4343CysfsTer3 | Frameshift   | 29 of 29                     | 4343 of 4564        | 0.001                | Likely Pathogenic | Asian     |
| 14                               | CACNA1S | 1q32.1   | c.5104C>T         | p.Arg1702Ter       | Stop gained  | 41 of 44                     | 1702 of 1874        | 0.02                 | Likely Pathogenic | Black     |

Table S2: Comprehensive list of pathogenic (P)/likely pathogenic (LP) variants that were identified through WES and confirmed by Sanger sequencing. Those marked with asterisks were in the same patient.

P variants have a >99% certainty of pathogenicity,<sup>26</sup> and LP variants have >90% certainty of pathogenicity in known disease-causing genes.<sup>26</sup> Identification of these variants does not require *in vitro* analysis due to proven or likely pathogenicity. The list of MAG originally consisted of 56 genes in version 1 (v.1.0)<sup>27</sup>, which was then updated to 59 MAG (v.2.0),<sup>28,29</sup> and recently updated to 73 genes (v.3.0).<sup>30,31</sup> We utilized v.2.0 since control UKB<sup>5</sup> and eMERGE<sup>6</sup> databases did also.

The American College of Medical Genetics and Genomics (ACMG) defines MAG variants, also called “secondary findings”,<sup>27</sup> as variants that must have proven pathogenicity, a high likelihood of causing disease (high penetrance) and have clinical relevance with available preventative or therapeutic options. Disorders of MAG consist of cancer, cardiovascular diseases (CVD), inborn errors of metabolism, and miscellaneous.<sup>27-29</sup> These genes predominantly exhibit autosomal dominant (AD) inheritance as well as several X-linked disorders capable of affecting females.

| Num. | Gene           | Genetic disorder                                                                                         | Penetrance and Risk                                                                                                                                                                          | PMID                                           |
|------|----------------|----------------------------------------------------------------------------------------------------------|----------------------------------------------------------------------------------------------------------------------------------------------------------------------------------------------|------------------------------------------------|
| 1    | <i>BRCA1</i>   | Breast/Ovarian/Pancreatic Cancer                                                                         | Breast (40-87%) <sup>1</sup> Ovarian (16-86%) <sup>1</sup> Pancreatic (2.5%) <sup>2</sup>                                                                                                    | 28632866 <sup>1</sup><br>35077220 <sup>2</sup> |
| 2    | <i>BRCA2</i>   | Breast/Ovarian/Pancreatic Cancer                                                                         | Breast (27-84%) <sup>1</sup> Ovarian (13-32%) <sup>1</sup> Pancreatic (2.5%) <sup>2</sup>                                                                                                    | 28632866 <sup>1</sup><br>35077220 <sup>2</sup> |
| 3    | <i>MYH11</i>   | Aortic dissection                                                                                        | 17%                                                                                                                                                                                          | 17666408                                       |
| 4    | <i>GLA</i>     | Fabry Disease (cardiac, cerebrovascular, and renal)                                                      | Neuropathic pain (64%), Renal impairment (33%) and ESRD (1%), TIA or stroke (27%), Tinnitus and hearing loss (47%), Gastrointestinal symptoms (53%)                                          | 15025684                                       |
| 5    | <i>PKP2</i>    | Arrhythmogenic right ventricular dysplasia/ cardiomyopathy                                               | Arrhythmogenic right ventricular dysplasia/ cardiomyopathy (11-47%)                                                                                                                          | 17010805                                       |
| 6    | <i>KCNQ1</i>   | Familial atrial fibrillation, Long QT syndrome                                                           | Long QT syndrome (73%), Sudden death (9.5%)                                                                                                                                                  | 12702160                                       |
| 7    | <i>SCN5A</i>   | 6 different cardiac arrhythmias; Brugada Syndrome                                                        | Syncope (22-30%) <sup>1,2</sup> . Sudden cardiac death (10-20%) <sup>1,2</sup>                                                                                                               | 27472692 <sup>1</sup><br>27566755 <sup>2</sup> |
| 8    | <i>RYR1</i>    | Central core disease of muscle malignant hyperthermia                                                    | Penetrance of malignant hyperthermia (40.6%)                                                                                                                                                 | 31206373                                       |
| 9    | <i>APOB</i>    | Familial hypercholesterolemia                                                                            | Nearly all patients have hepatic steatosis 5-10% develop severe hepatic steatosis with occasional progression to cirrhosis                                                                   | 33983694                                       |
| 10   | <i>CACNA1S</i> | Hypokalemic periodic paralysis                                                                           | Hypokalemic periodic paralysis (84-100%) characterized by low potassium, myopathy, and recurrent episodic paralysis                                                                          | 15098604                                       |
| 11   | <i>ALPL</i>    | Hypophosphatasia                                                                                         | Likely complete penetrance. Dental caries, bone pain and fractures, premature loss of teeth                                                                                                  | 20301329                                       |
| 12   | <i>ANXA11</i>  | Amyotrophic lateral sclerosis breast, colon and ovarian cancer associations                              | Known penetrance for ALS genes is ~90%                                                                                                                                                       | 23941283                                       |
| 13   | <i>ATM</i>     | Breast cancer                                                                                            | 60% risk breast cancer by age 80, 5-9-fold increased risk of all cancer in women                                                                                                             | 35354106                                       |
| 14   | <i>BEST1</i>   | Vitelliform Macular Dystrophy                                                                            | Slow progressive visual impairment (>70%)                                                                                                                                                    | 20301346                                       |
| 15   | <i>CIQTNF5</i> | Late onset macular degeneration                                                                          | Fully penetrant. Visual difficulties in 40's and lose their eyesight after >60 years of age                                                                                                  | 24531000                                       |
| 16   | <i>CFHR5</i>   | C3 Glomerulopathy                                                                                        | Hematuria (80%) <sup>1</sup> . Hypertension (50%) <sup>1</sup> , ESRD development within 10 years of diagnosis (70%) <sup>2</sup>                                                            | 27490940 <sup>1</sup><br>30692664 <sup>2</sup> |
| 17   | <i>CLCN7</i>   | Osteopetrosis in late childhood/adolescence                                                              | Penetrance (60-90%), fractures (60-80%) with a mean of 3 fractures per person, hearing and vision loss (19%)                                                                                 | 20301306                                       |
| 18   | <i>DUSP6</i>   | Hypogonadotropic hypogonadism                                                                            | Penetrance unknown                                                                                                                                                                           | 32389901                                       |
| 19   | <i>ERCC6</i>   | Premature ovarian insufficiency                                                                          | Unknown penetrance                                                                                                                                                                           | 26218421                                       |
| 20   | <i>GBA</i>     | Early Onset Parkinson Disease                                                                            | Penetrance 6-14%. Onset before 50 years of age with higher likelihood of cognitive impairment                                                                                                | 20301402                                       |
| 21   | <i>IMPG2</i>   | Adult-onset macular dystrophy                                                                            | Macular vitelliform dystrophy was noted in 69% of patients. Mean age of onset is 43 years of age                                                                                             | 25085631                                       |
| 22   | <i>KCNJ11</i>  | Transient diabetes of the newborn<br>Permanent Diabetes of the newborn<br>Non-insulin dependent diabetes | Highly penetrant. <sup>1</sup> 50% of patient who develop transient neonatal diabetes will develop diabetes later in life. <sup>2</sup> 20% have associated neurologic features <sup>1</sup> | 133529164 <sup>1</sup><br>7446535 <sup>2</sup> |
| 23   | <i>MEF2A</i>   | Coronary Artery Disease                                                                                  | High, but likely incomplete penetrance                                                                                                                                                       | 15931371                                       |
| 24   | <i>PKD1</i>    | Polycystic kidney disease                                                                                | Almost 100% penetrance with almost all patients having ESRD by age 70. Average age of onset for ESRD is 55 years of age.                                                                     | 20301424                                       |
| 25   | <i>PSEN1</i>   | Alzheimer's disease                                                                                      | With no family history of Alzheimer's disease (15-25%) with a family history of Alzheimer's disease (30-50%)                                                                                 | 20301340                                       |
| 26   | <i>RAD51C</i>  | Breast/Ovarian Cancer                                                                                    | Breast (30%) Ovarian (20-23%)                                                                                                                                                                | 32107557                                       |
| 27   | <i>SLC25A4</i> | Progressive external ophthalmoplegia, cardiomyopathy                                                     | Variable penetrance                                                                                                                                                                          | 20301382                                       |
| 28   | <i>TTN</i>     | Hereditary Myopathy with Early Respiratory Failure                                                       | Likely complete penetrance. Progressive myopathy presenting between 30-50 years old. Often require respiratory support.                                                                      | 24575448                                       |
| 29   | <i>TTR</i>     | Neuropathy, Cardiac amyloidosis                                                                          | Overall disease risk by age 70 (36-91%) Cardiac amyloidosis (>66%)                                                                                                                           | 20301373                                       |
| 30   | <i>VWF</i>     | von Willebrand Disease type 2                                                                            | Fully penetrant. Manifests as excessive bleeding with surgery                                                                                                                                | 20301765                                       |

Table S3. List of genes with P/LP variants identified in the study population. Numbers 1-10 document the medically actionable genes. Numbers 11-30 denote other P/LP variants identified.



| <b>Genes related to cancer phenotypes</b> | <b>Number of VUS (58)</b> |
|-------------------------------------------|---------------------------|
| STK11                                     | 1                         |
| BRCA1                                     | 5                         |
| BRCA2                                     | 6                         |
| TSC2                                      | 8                         |
| RB1                                       | 1                         |
| WT1                                       | 2                         |
| PTEN                                      | 1                         |
| BMPR1A                                    | 2                         |
| RET                                       | 3                         |
| TSC1                                      | 4                         |
| PMS2                                      | 3                         |
| APC                                       | 7                         |
| MLH1                                      | 4                         |
| VHL                                       | 2                         |
| MSH6                                      | 4                         |
| MSH2                                      | 2                         |
| MUTYH                                     | 3                         |

| <b>Genes related to inborn errors in metabolism and miscellaneous phenotypes</b> |                           |
|----------------------------------------------------------------------------------|---------------------------|
| <b>Genes related to inborn errors in metabolism</b>                              | <b>Number of VUS (2)</b>  |
| GLA                                                                              | 2                         |
| <b>Genes related miscellaneous phenotypes</b>                                    | <b>Number of VUS (43)</b> |
| RYR1                                                                             | 13                        |
| ATP7B                                                                            | 9                         |
| APOB                                                                             | 10                        |
| CACNA1S                                                                          | 11                        |

| <b>Genes related to cardiovascular phenotypes</b> | <b>Number of VUS (93)</b> |
|---------------------------------------------------|---------------------------|
| DSG2                                              | 8                         |
| DSC2                                              | 2                         |
| PKP2                                              | 3                         |
| KCNQ1                                             | 1                         |
| DSP                                               | 11                        |
| SCN5A                                             | 9                         |
| RYR2                                              | 11                        |
| TMEM43                                            | 1                         |
| TINNI3                                            | 1                         |
| ACTC1                                             | 1                         |
| MYL2                                              | 1                         |
| MYH7                                              | 2                         |
| MYBPC3                                            | 12                        |
| LMNA                                              | 1                         |
| MYL3                                              | 1                         |
| TNNT2                                             | 1                         |

|               |          |
|---------------|----------|
| <b>PCSK9</b>  | <b>1</b> |
| <b>COL3A1</b> | <b>4</b> |
| <b>FBN1</b>   | <b>9</b> |
| <b>TGFBR1</b> | <b>1</b> |
| <b>TGFBR2</b> | <b>1</b> |
| <b>ACTA2</b>  | <b>1</b> |
| <b>SMAD3</b>  | <b>1</b> |
| <b>MYH11</b>  | <b>9</b> |

Table S4: 196 variants of uncertain significance (VUS) in 46 medically actionable genes with a CADD score >20 were identified. All were present at a frequency of <0.01 in the gnomAD database. The genes are listed here with the number of VUS for each gene in parentheses.

| No. | Gene    | Cytoband | HGVS Coding                                      | Protein change          | Variant type | Affected Exon | Gnomad Frequency (%) | ACMG Call | Race       |
|-----|---------|----------|--------------------------------------------------|-------------------------|--------------|---------------|----------------------|-----------|------------|
| 1   | ALPL    | 1p36.12  | c.1363G>A                                        | p.Gly455Ser             | Missense     | 12 of 12      | 0.041                | P         | Caucasian  |
| 2   | ANXA11  | 10q22.3  | c.112G>A                                         | p.Gly38Arg              | Missense     | 38 of 506     | 0.008                | P         | Caucasian  |
| 3   | ATM     | 11q22.3  | c.3538del                                        | p.Val1180Ter            | Stop gained  | 1180 of 3057  | 0                    | P         | Caucasian  |
| 4   | BEST1   | 11q12.3  | c.404C>T                                         | p.Ala135Val             | Missense     | 4 of 9        | 0.04                 | P         | Caucasian  |
| 5   | C1QTNF5 | 11q23.3  | c.-2366+1G>A                                     | -                       | Splice site  | -             | 0.003                | P         | Caucasian  |
| 6   | CFHR5   | 1q31.3   | c.678del                                         | p.Glu226AspfsTer7       | Frameshift   | 5 of 10       | 0.001                | P         | Black      |
| 7   | CLCN7   | 16p13.3  | c.2299C>T                                        | p.Arg767Trp             | Missense     | 24 of 25      | 0                    | P         | Caucasian  |
| 8   | DUSP6   | 12q21.33 | c.566A>G                                         | p.Asn189Ser             | Missense     | 2 of 3        | 0.068                | P         | Caucasian  |
| 9   | ERCC6   | 10q11.23 | c.3607_3608insGG<br>GCTGGCTGCTTAA<br>GGTCCACCTTA | p.Lys1203ArgfsTer3<br>3 | Frameshift   | 18 of 21      | 0                    | P         | Caucasian  |
| 10  | GBA     | 1q22     | c.1226A>G                                        | p.Asn409Ser             | Missense     | 10 of 12      | 0.27                 | P         | Black      |
| 11  | IMPG2   | 3q12.3   | c.3023-6_3030dup                                 | p.Ala1011PhefsTer2      | Stop gained  | 15 of 19      | 0.002                | P         | Caucasian  |
| 12  | KCNJ11  | 11p15.1  | c.185C>T                                         | p.Thr62Met              | Missense     | 1 of 753      | 0                    | P         | Caucasian  |
| 13  | MEF2A   | 15q26.3  | c.836C>T                                         | p.Pro279Leu             | Missense     | 8 of 11       | 0.118                | LP        | Caucasian  |
| 14  | PKD1    | 16p13.3  | c.12391G>T                                       | p.Glu4131Ter            | Stop gained  | 45 of 46      | 0.003                | P         | Asian      |
| 15  | PSEN1   | 14q24.2  | c.617G>C                                         | p.Gly206Ala             | Missense     | 7 of 12       | 0.051                | P         | Caucasian  |
| 16  | RAD51C  | 17q22    | c.577C>T                                         | p.Arg193Ter             | Stop gained  | 4 of 9        | 0.004                | P         | Caucasian  |
| 17  | SLC25A4 | 4q35.1   | c.523del                                         | p.Gln175ArgfsTer38      | Frameshift   | 2 of 4        | 0                    | P         | Caucasian  |
| 18  | TTN     | 2q31.2   | c.73254_73255del                                 | p.Glu24419IlefsTer2     | Stop gained  | 276 of 313    | 0.017                | LP        | Caucasian  |
| 19  | TTR     | 18q12.1  | c.424G>A                                         | p.Val142Ile             | Missense     | 4 of 4        | 0.59                 | P         | Black      |
| 20  | VWF*    | 12p13.31 | c.2561G>A                                        | p.Arg854Gln             | Missense     | 20 of 52      | 0.9                  | P         | Caucasian* |

Table S5: AD pathogenic variants not included in the 59 MAG genes, which could affect health. 20 P/LP variants were identified in 21 individuals.

| Num | Gene    | Disorder                                                                                              | Disease Prevalence                               | Precent Disease That is Genetic | Percent Genetic Due to This Gene | Prevalence of pathogenic variants for gene in the general populations (%) | PMID                                           |
|-----|---------|-------------------------------------------------------------------------------------------------------|--------------------------------------------------|---------------------------------|----------------------------------|---------------------------------------------------------------------------|------------------------------------------------|
| 1   | ALPL    | Hypophosphatasia                                                                                      | Moderate: 1/6,300<br>Severe: 1/300,00            | 100%                            | 47%                              | 0 – 0.025                                                                 | 29659871                                       |
| 2   | ANXA11  | Amyotrophic lateral sclerosis                                                                         | 4-6/100,000                                      | 5-10%                           | 1.1%                             | 0 – 0.088                                                                 | 36162820                                       |
| 3   | ATM     | Hereditary breast & ovarian cancer                                                                    | Breast:12%<br>Ovarian: 1.5%<br>Male breast: 0.1% | 5-10%                           | 1%                               | 0 – 0.069                                                                 | 29719442<br>34493284<br>33406487               |
| 4   | BEST1   | Vitelliform macular dystrophy-2; Vitreoretinocoroidopathy                                             | 1/5,500                                          | ?                               | ?                                | 0 – 0.038                                                                 | 20301346                                       |
| 5   | C1QTNF5 | Late onset macular degeneration C3                                                                    | 8.7%                                             | ?                               | ?                                | 0.0049 – 0.44                                                             | 24531000                                       |
| 6   | CFHR5   | glomerulopathy                                                                                        | 2/1,000,000                                      | 25%                             | 4-16%                            | 0.0099 – 0.95                                                             | 33096866                                       |
| 7   | CLCN7   | Osteopetrosis                                                                                         | 1/1,000,000-1/5,000,000                          | 50-80%                          | 75%                              | 0 – 0.020                                                                 | 33105733<br>20301306                           |
| 8   | DUSP6   | Normosmic hypogonadotropic hypogonadism; Kallmann syndrome                                            | 1/8,000 males<br>1/40,000 females                | 50%                             | 1%                               | 0 – 0.0035                                                                | 23643382<br>32389901                           |
| 9   | ERCC6   | Primary ovarian insufficiency                                                                         | 1-3%                                             | 20-25%                          | 0.5%                             | 0 – 0.15                                                                  | 26218421                                       |
| 10  | GBA     | Adult-onset Parkinson disease                                                                         | 1-/1,000                                         | 10-15%                          | 13.7%                            | 0 – 0.022                                                                 | 17875915<br>28150045                           |
| 11  | IMPG2   | Adult-onset macular dystrophy-5                                                                       | 0.05% before 50<br>12% after age 80              | ?                               | 8%                               | 0 – 0.022                                                                 | 25085631<br>25085631                           |
| 12  | KCNJ11  | NIDDM                                                                                                 | 6.28%                                            | 20%-80%                         | 26-64%                           | 0 – 0.076                                                                 | 32175717<br>30169531<br>23961321<br>32742886   |
| 13  | MEF2A   | Coronary artery disease                                                                               | 1.72%<br>Worldwide<br>5-10% USA                  | 40% to 60%                      | 1.93%                            | 0 – 0.00091                                                               | 15861005<br>17301730                           |
| 14  | PKD1    | Autosomal dominant polycystic kidney disease                                                          | 1/1,000                                          | 98%                             | 78%                              | 0 – 0.049                                                                 | 29326913<br>30135240                           |
| 15  | PSEN1   | Early Onset Alzheimer disease                                                                         | 1-2/1,000                                        | 10-15%                          | 20-70%                           | 0 – 0.015                                                                 | 29599933<br>28350801<br>10441572               |
| 16  | RAD51C  | Breast and ovarian cancer                                                                             | Breast:12%<br>Ovarian: 1.5%<br>Male breast: 0.1% | 5-10%                           | 0.23-0.45%                       | 0 – 0.082                                                                 | 29719442<br>33406487                           |
| 17  | SLC25A4 | Progressive external ophthalmoplegia; Mitochondrial DNA depletion syndrome 12A (cardiomyopathic type) | 1.2/100,000                                      | ?                               | ?                                | 0 – 0.0055                                                                | 20301382                                       |
| 18  | TTN     | Hereditary myopathy with early respiratory failure                                                    | ?                                                | ?                               | 5%                               | 0 – 2.1                                                                   | 26701604                                       |
| 19  | TTR     | Neuropathy with cardiac amyloidosis                                                                   | 1/1,000,000                                      | 100%                            | 8%                               | 0 – 0.0029                                                                | 32456532                                       |
| 20  | VWF     | Von Willebrand type 2                                                                                 | 1/107,000                                        | 15-30%                          | 60%                              | 0 – 0.097                                                                 | Obstet Gynecol<br>2013;122:1368-73<br>30279008 |

Table S6: The frequency of P/LP variants for the non-MAG genes in the general population is shown above. The prevalence of pathogenic variants in the general population was collected using the Varsome database.

| Num | Gene           | White   | African/<br>African American | Latino | Asian  | Other |
|-----|----------------|---------|------------------------------|--------|--------|-------|
| 1   | <i>ALPL</i>    | 0.025   | 0.025                        | 0.023  | 0.025  | 0     |
| 2   | <i>ANXA11</i>  | 0.021   | 0.044                        | 0.067  | 0.11   | 0.016 |
| 3   | <i>ATM</i>     | 0.28    | 0.068                        | 0.19   | 0.29   | 0.20  |
| 4   | <i>BEST1</i>   | 0.020   | 0.0062                       | 0.017  | 0.042  | 0.033 |
| 5   | <i>C1QTNF5</i> | 0.094   | 0.44                         | 0.035  | 0.093  | 0.099 |
| 6   | <i>CFHR5</i>   | 0.040   | 0.074                        | 0.075  | 0.98   | 0.21  |
| 7   | <i>CLCN7</i>   | 0.034   | 0.0062                       | 0.012  | .0098  | 0.016 |
| 8   | <i>DUSP6</i>   | 0.002   | 0                            | 0      | 0.0035 | 0     |
| 9   | <i>ERCC6</i>   | 0.26    | 0.093                        | 0.064  | 0.11   | 0.033 |
| 10  | <i>GBA</i>     | 0.055   | 0                            | 0.0058 | 0.042  | 0.016 |
| 11  | <i>IMPG2</i>   | 0.037   | 0.025                        | 0.020  | 0.10   | 0     |
| 12  | <i>KCNJ11</i>  | 0       | 0                            | 0      | 0      | 0     |
| 13  | <i>MEF2A</i>   | 0.00091 | 0                            | 0      | 0      | 0     |
| 14  | <i>PKD1</i>    | 0.028   | 0.0062                       | 0.012  | 0.060  | 0.017 |
| 15  | <i>PSEN1</i>   | 0.019   | 0.0062                       | 0.015  | 0.0054 | 0     |
| 16  | <i>RAD51C</i>  | 0.089   | 0.031                        | 0.012  | 0.16   | 0.065 |
| 17  | <i>SLC25A4</i> | 0.0044  | 0                            | 0.0029 | 0.0055 | 0     |
| 18  | <i>TTN</i>     | 1.3     | 2.2                          | 0.63   | 1.2    | 0.59  |
| 19  | <i>TTR</i>     | 0.0026  | 0                            | 0.0029 | 0      | 0     |
| 20  | <i>VWF</i>     | 0.22    | 0.093                        | 0.038  | 0.36   | 0.16  |

Table S7: The percent prevalence of pathogenic variants in the general population shown as subgroups by race and ethnicity. This data was collected using the Varsome database. (Of note, the white population is a combined group of Ashkenazi Jewish, Finnish, and European non-Finnish from the Varsome data base). The Asian population was determined by combining east and south Asian subsets from the Varsome data base.

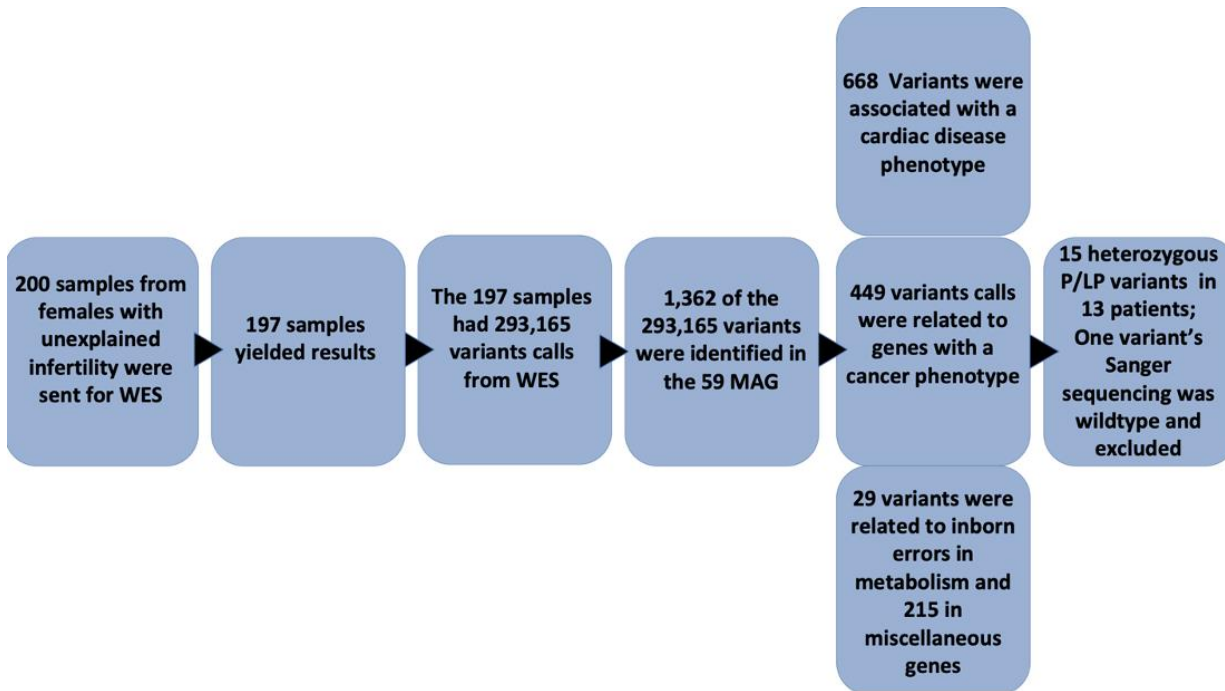

Figure S1. Filtering for P/LP variants in the 59 medically actionable genes

## References

1. Diamond MP, Legro RS, Coutifaris C, et al. Assessment of multiple intrauterine gestations from ovarian stimulation (AMIGOS) trial: baseline characteristics. *Fertil Steril* 2015;103(4):962-973 e4. DOI: 10.1016/j.fertnstert.2014.12.130.
2. Diamond MP, Legro RS, Coutifaris C, et al. Letrozole, Gonadotropin, or Clomiphene for Unexplained Infertility. *N Engl J Med* 2015;373(13):1230-40. DOI: 10.1056/NEJMoa1414827.
3. Theisen JG, Sundaram V, Filchak MS, et al. The Use of Whole Exome Sequencing in a Cohort of Transgender Individuals to Identify Rare Genetic Variants. *Scientific reports* 2019;9(1):20099. DOI: 10.1038/s41598-019-53500-y.
4. Kircher M, Witten DM, Jain P, O'Roak BJ, Cooper GM, Shendure J. A general framework for estimating the relative pathogenicity of human genetic variants. *Nat Genet* 2014;46(3):310-5. DOI: 10.1038/ng.2892.
5. Van Hout CV, Tachmazidou I, Backman JD, et al. Exome sequencing and characterization of 49,960 individuals in the UK Biobank. *Nature* 2020;586(7831):749-756. DOI: 10.1038/s41586-020-2853-0.
6. e MCAWG. Frequency of genomic secondary findings among 21,915 eMERGE network participants. *Genet Med* 2020;22(9):1470-1477. DOI: 10.1038/s41436-020-0810-9.
7. Barnhart KT. Introduction: Fertility as a window to health. *Fertil Steril* 2018;110(5):781-782. DOI: 10.1016/j.fertnstert.2018.08.031.
8. Stentz NC, Koelper N, Barnhart KT, Sammel MD, Senapati S. Infertility and mortality. *Am J Obstet Gynecol* 2020;222(3):251 e1-251 e10. DOI: 10.1016/j.ajog.2019.09.007.
9. Hanson B, Johnstone E, Dorais J, Silver B, Peterson CM, Hotaling J. Female infertility, infertility-associated diagnoses, and comorbidities: a review. *J Assist Reprod Genet* 2017;34(2):167-177. DOI: 10.1007/s10815-016-0836-8.
10. de Kat AC, Verschuren WM, Eijkemans MJ, Broekmans FJ, van der Schouw YT. Anti-Mullerian Hormone Trajectories Are Associated With Cardiovascular Disease in Women: Results From the Doetinchem Cohort Study. *Circulation* 2017;135(6):556-565. DOI: 10.1161/CIRCULATIONAHA.116.025968.
11. Roeters van Lennep JE, Heida KY, Bots ML, Hoek A, collaborators of the Dutch Multidisciplinary Guideline Development Group on Cardiovascular Risk Management after Reproductive D. Cardiovascular disease risk in women with premature ovarian insufficiency: A systematic review and meta-analysis. *Eur J Prev Cardiol* 2016;23(2):178-86. DOI: 10.1177/2047487314556004.
12. Murugappan G, Li S, Alvero RJ, Luke B, Eisenberg ML. Association between infertility and all-cause mortality: analysis of US claims data. *Am J Obstet Gynecol* 2021. DOI: 10.1016/j.ajog.2021.02.010.
13. Daum H, Peretz T, Laufer N. BRCA mutations and reproduction. *Fertil Steril* 2018;109(1):33-38. DOI: 10.1016/j.fertnstert.2017.12.004.
14. Oktay K, Kim JY, Barad D, Babayev SN. Association of BRCA1 mutations with occult primary ovarian insufficiency: a possible explanation for the link between infertility and breast/ovarian cancer risks. *J Clin Oncol* 2010;28(2):240-4. DOI: 10.1200/JCO.2009.24.2057.
15. Zhang J, Gurusaran M, Fujiwara Y, et al. The BRCA2-MEILB2-BRME1 complex governs meiotic recombination and impairs the mitotic BRCA2-RAD51 function in cancer cells. *Nat Commun* 2020;11(1):2055. DOI: 10.1038/s41467-020-15954-x.
16. Janisiw E, Dello Stritto MR, Jantsch V, Silva N. BRCA1-BARD1 associate with the synaptonemal complex and pro-crossover factors and influence RAD-51 dynamics during *Caenorhabditis elegans* meiosis. *PLoS Genet* 2018;14(11):e1007653. DOI: 10.1371/journal.pgen.1007653.
17. Titus S, Li F, Stobezki R, et al. Impairment of BRCA1-related DNA double-strand break repair leads to ovarian aging in mice and humans. *Sci Transl Med* 2013;5(172):172ra21. DOI: 10.1126/scitranslmed.3004925.

18. Turan V, Oktay K. BRCA-related ATM-mediated DNA double-strand break repair and ovarian aging. *Hum Reprod Update* 2020;26(1):43-57. DOI: 10.1093/humupd/dmz043.
19. Finch A, Valentini A, Greenblatt E, et al. Frequency of premature menopause in women who carry a BRCA1 or BRCA2 mutation. *Fertil Steril* 2013;99(6):1724-8. DOI: 10.1016/j.fertnstert.2013.01.109.
20. Rzepka-Gorska I, Tarnowski B, Chudecka-Glaz A, Gorski B, Zielinska D, Toloczko-Grabarek A. Premature menopause in patients with BRCA1 gene mutation. *Breast Cancer Res Treat* 2006;100(1):59-63. DOI: 10.1007/s10549-006-9220-1.
21. Murugappan G, Li S, Lathi RB, Baker VL, Eisenberg ML. Risk of cancer in infertile women: analysis of US claims data. *Hum Reprod* 2019;34(5):894-902. DOI: 10.1093/humrep/dez018.
22. Quinn MM, Cedars MI. Cardiovascular health and ovarian aging. *Fertil Steril* 2018;110(5):790-793. DOI: 10.1016/j.fertnstert.2018.07.1152.
23. Cedars MI, Taymans SE, DePaolo LV, Warner L, Moss SB, Eisenberg ML. The sixth vital sign: what reproduction tells us about overall health. Proceedings from a NICHD/CDC workshop. *Hum Reprod Open* 2017;2017(2):hox008. DOI: 10.1093/hropen/hox008.
24. Yang Y, Muzny DM, Reid JG, et al. Clinical whole-exome sequencing for the diagnosis of mendelian disorders. *N Engl J Med* 2013;369(16):1502-11. DOI: 10.1056/NEJMoa1306555.
25. Adams DR, Eng CM. Next-Generation Sequencing to Diagnose Suspected Genetic Disorders. *N Engl J Med* 2018;379(14):1353-1362. DOI: 10.1056/NEJMra1711801.
26. Gregg AR, Aarabi M, Klugman S, et al. Screening for autosomal recessive and X-linked conditions during pregnancy and preconception: a practice resource of the American College of Medical Genetics and Genomics (ACMG). *Genet Med* 2021;23(10):1793-1806. DOI: 10.1038/s41436-021-01203-z.
27. Green RC, Berg JS, Grody WW, et al. ACMG recommendations for reporting of incidental findings in clinical exome and genome sequencing. *Genet Med* 2013;15(7):565-74. DOI: 10.1038/gim.2013.73.
28. Kalia SS, Adelman K, Bale SJ, et al. Recommendations for reporting of secondary findings in clinical exome and genome sequencing, 2016 update (ACMG SF v2.0): a policy statement of the American College of Medical Genetics and Genomics. *Genet Med* 2017;19(2):249-255. DOI: 10.1038/gim.2016.190.
29. Webber EM, Hunter JE, Biesecker LG, et al. Evidence-based assessments of clinical actionability in the context of secondary findings: Updates from ClinGen's Actionability Working Group. *Hum Mutat* 2018;39(11):1677-1685. DOI: 10.1002/humu.23631.
30. Miller DT, Lee K, Chung WK, et al. Correction to: ACMG SF v3.0 list for reporting of secondary findings in clinical exome and genome sequencing: a policy statement of the American College of Medical Genetics and Genomics (ACMG). *Genet Med* 2021;23(8):1582-1584. DOI: 10.1038/s41436-021-01278-8.
31. Miller DT, Lee K, Gordon AS, et al. Recommendations for reporting of secondary findings in clinical exome and genome sequencing, 2021 update: a policy statement of the American College of Medical Genetics and Genomics (ACMG). *Genet Med* 2021;23(8):1391-1398. DOI: 10.1038/s41436-021-01171-4.
